# Supplementary material for: Diversification rates and phenotypic evolution in venomous snakes (Elapidae)
Source: PubMed Central journal article supplement (PMC4736917; doi:10.1098/rsos.150277), 2016-01-20

Table S1. New taxa and sequences added to the alignment in Pyron et al. (2013), to generate the matrix in File S1. **Shaded** cells indicate taxa included based on loci and sequences from Sanders et al. [19]. Genbank numbers for new sequences from this study are highlighted in **red**.

|                                         | 16S      | 12S      | ND4      | cytb     | cmos     | RAG1     |
|-----------------------------------------|----------|----------|----------|----------|----------|----------|
| <i>Aipysurus_foliosquama</i>            | KU240026 |          |          | KP205509 |          |          |
| <i>Aipysurus_mosaicus</i>               |          |          |          |          |          |          |
| <i>Aipysurus_pooleorum</i>              |          |          |          |          |          |          |
| <i>Brachyuropis_approximans</i>         | KF736406 | KF709658 |          |          |          |          |
| <i>Brachyuropis_australis</i>           | KF736383 | KF709663 |          |          |          |          |
| <i>Brachyuropis_incinctus</i>           | KF736319 | KF709668 |          |          |          |          |
| <i>Brachyuropis_roperi</i>              | KF736376 | KF709666 |          |          |          |          |
| <i>Hydrophis_(Kolpophis)_annandalei</i> | KU240027 |          | KU240028 | KU240025 |          |          |
| <i>Hydrophis_belcheri</i>               |          |          |          |          |          |          |
| <i>Hydrophis_bituberculatus</i>         |          |          | KU240029 |          |          |          |
| <i>Hydrophis_coggeri</i>                |          |          |          |          |          |          |
| <i>Hydrophis_donaldi</i>                | JQ217147 |          | JQ217211 | JQ217202 | KC014308 | KC014285 |
| <i>Hydrophis_fasciatus</i>              |          |          |          |          |          |          |
| <i>Hydrophis_jerdoni</i>                |          |          |          |          |          |          |
| <i>Hydrophis_lamberti</i>               |          |          |          |          |          |          |
| <i>Hydrophis_obscurus</i>               |          |          |          |          |          |          |
| <i>Hydrophis_ocellatus</i>              |          |          |          |          |          |          |
| <i>Hydrophis_pachycercos</i>            |          |          |          |          |          |          |
| <i>Hydrophis_stricticollis</i>          |          |          |          |          |          |          |
| <i>Hydrophis_torquatus</i>              |          |          | KU240030 |          |          |          |
| <i>Hydrophis_viperinus</i>              |          |          |          |          |          |          |
| <i>Hydrophis_zweifeli</i>               | JX987143 |          | JX987173 | JX987165 | JX987183 | JX987177 |
| <i>Laticauda_semifasciata</i>           |          |          |          | AB701344 |          |          |
| <i>Microcephalophis_gracilis</i>        |          |          |          |          |          |          |
| <i>Micrurus_mosquitensis</i>            |          |          | JF308712 |          |          |          |
| <i>Micrurus_spixii</i>                  |          |          | JF308708 |          |          |          |
| <i>Micrurus_tener</i>                   |          |          | JF308711 |          |          |          |
| <i>Oxyuranus_temporalis</i>             |          |          | JN834014 |          |          |          |
| <i>Simoselaps_littoralis</i>            | KF736320 | KF709683 |          |          |          |          |
| <i>Simoselaps_minimus</i>               | KF736359 | KF709688 |          |          |          |          |
| <i>Vermicella_annulata</i>              | KF736401 | KF709677 |          |          |          |          |
| <i>Vermicella_multifasciata</i>         | KF736403 | KF709678 |          |          |          |          |
| <i>Vermicella_snelli</i>                | KF736400 | KF709675 |          |          |          |          |

Table S2. The four calibration points used in the dated phylogenetic analysis, enforced as offset exponential distributions with the hard minima (offset) and soft maxima (encompassing 95% of distribution). The MrBayes commands are in File S1.

| Node                               | Hard Minimum | Soft 95% Maximum | Comments                                                                                                                                                                                                                                                                                                                                                                                                                                                                                                                                                                                                                                                                                                                                                                                                          |
|------------------------------------|--------------|------------------|-------------------------------------------------------------------------------------------------------------------------------------------------------------------------------------------------------------------------------------------------------------------------------------------------------------------------------------------------------------------------------------------------------------------------------------------------------------------------------------------------------------------------------------------------------------------------------------------------------------------------------------------------------------------------------------------------------------------------------------------------------------------------------------------------------------------|
| Elapidae                           | 24.95        | 37.2             | Hard Min: The oldest crown elapid vertebrae are 24.95 Ma (McCartney et al. 2014), with one taxon having similarities to asian elapids and another taxon similarities to African elapids. Other elapids (but not definitely crown) are known from 20-25Ma (Rage 1988). Soft Max: Numerous caenophidians, including colubroids, are present in the deposits that are ~34 Ma, ~35Ma and 37.2Ma (Head et al. 2005; Sanders et al. 2008), but no potential elapids (stem or crown) have been reported, suggesting they were absent during this interval.                                                                                                                                                                                                                                                               |
| Hydrophiinae ( <i>sensu lato</i> ) | 16           | 26               | Hard Min: The oldest Hydrophiinae - Australasian terrestrial and marine elapids - is from RSO site in North Queensland (Scanlon et al. 2003) which is 16-23 Ma (Travouillon et al. 2006). Soft Max: There are no elapids known from all earlier sites in Australia, which span ages of 24-26Ma, so elapids were likely, but not definitely, absent during this interval.                                                                                                                                                                                                                                                                                                                                                                                                                                          |
| <i>Naja_Hemachatus</i> clade       | 18           | 32               | Hard Min: <i>Naja romani</i> is known from MN4, middle Orléanians (~18Ma: Ivanov 2002). It has a few synapomorphies with asiatic <i>Naja</i> (suggesting it belongs to crown <i>Naja</i> ), but retains some primitive traits (rare/absent in living <i>Naja</i> ) that conversely suggest it is a stem <i>Naja</i> (Szyndlar and Rage 1990). Until this is resolved, we take the conservative view and assume this species is at least total group <i>Naja</i> stem or crown, and thus at least dates the split between <i>Naja</i> and its nearest relative. Soft Max. Numerous deposits down to early Oligocene in Europe and North America (~32 Ma) have yielded a rich fauna of colubrids, including unidentified elapids 20-25 Ma, but nothing assignable to modern genera such as <i>Naja</i> (Rage 1988). |
| <i>Micrurus_Sinomicrurus</i>       | 18           | 32               | Hard Min: <i>Micrurus gallicus</i> is known from MN4, middle Orléanians (~18Ma: Ivanov 2002); it has similarities with extant <i>Micrurus</i> (Szyndlar and Schleich 1993). Soft Max. Numerous deposits down to early Oligocene in Europe and North America (~32 Ma) have yielded a rich fauna of colubrids, including unidentified elapids 20-25 Ma, but nothing assignable to modern genera such as <i>Micrurus</i> (Rage 1988).                                                                                                                                                                                                                                                                                                                                                                                |

Head J., Holroyd P.A., Hutchison J.H., Ciochon R.L. 2005. First report of snakes (Serpentes) from the late middle Eocene Pondaung formation, Myanmar. *J. Vert. Paleontol.* 25, 246–250.

Ivanov M. 2002. The oldest known Miocene snake fauna from Central Europe: Merkur–North locality, Czech Republic. *Acta Palaeontologica Polonica* 47, 513-534.

McCartney JA, Stevens NJ, O'Connor PM. 2014. The earliest colubroid-dominated snake fauna from Africa: perspectives from the Late Oligocene Nsungwe Formation of Southwestern Tanzania. *Plos ONE* 9(3): e90415. doi:10.1371/journal.pone.0090415.

Rage JC. 1988. The oldest known colubrid snakes: state of the art. *Acta Zool. Cracov.* 31:457–474.

Sanders KL, Lee MSY. 2008. Molecular evidence for a rapid late- Miocene radiation of Australasian venomous snakes (Elapidae: Colubroidea). *Mol. Phylogenet. Evol.* 46, 1180–1188.

Scanlon JD, Lee MSY, Archer M. 2003. Mid-Tertiary elapid snakes (Squamata, Colubroidea) from Riversleigh, northern Australia: early steps in a continent-wide adaptive radiation. *Geobios* 36, 573– 601.

Szyndlar Z, Rage JC. 1990. West Palearctic cobras of the genus *Naja* (Serpentes:Elapidae): interrelationships among extinct and extant species. *Amphibia-Reptilia* 11:385-400

Szyndlar Z, Schleich HH. 1993. Description of Miocene snakes from Petersbuch 2 with comments on the Lower and Middle Miocene ophidian faunas of Southern Germany. *Stuttgarter Beitr.ge zur Naturkunde Ser. B* 192,1–47.

Travouillon KJ, Archer M, Hand SJ, Godthelp H. 2006. Multivariate analyses of Cenozoic mammalian faunas from Riversleigh, northwestern Queensland. *Alcheringa Special Issue 1*, 323-349.

Fig. S1. "Best Tree": majority-rule consensus tree from the unconstrained MrBayes analysis ("best tree"). Posterior probabilities of clades are indicated, and timescale is in millions of years.

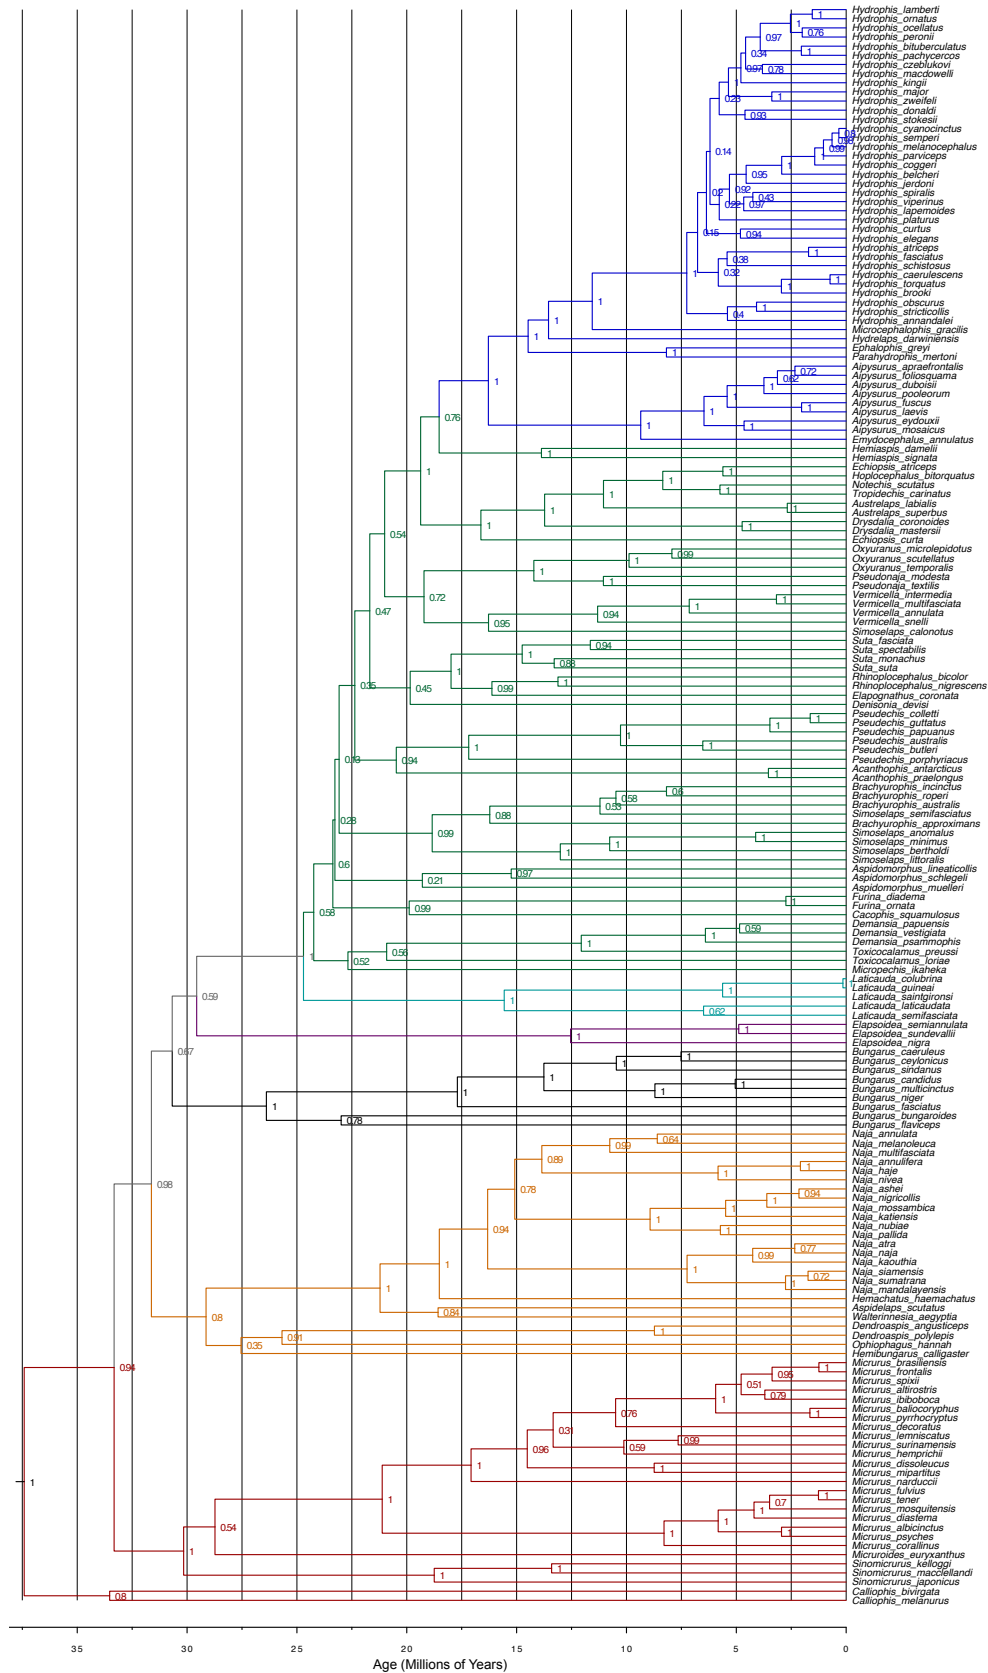

Fig. S2. "Alternative Tree": majority-rule consensus tree from the MrBayes analysis where coral snakes (red) are constrained to be monophyletic. Posterior probabilities of clades are indicated, and timescale is in millions of years.

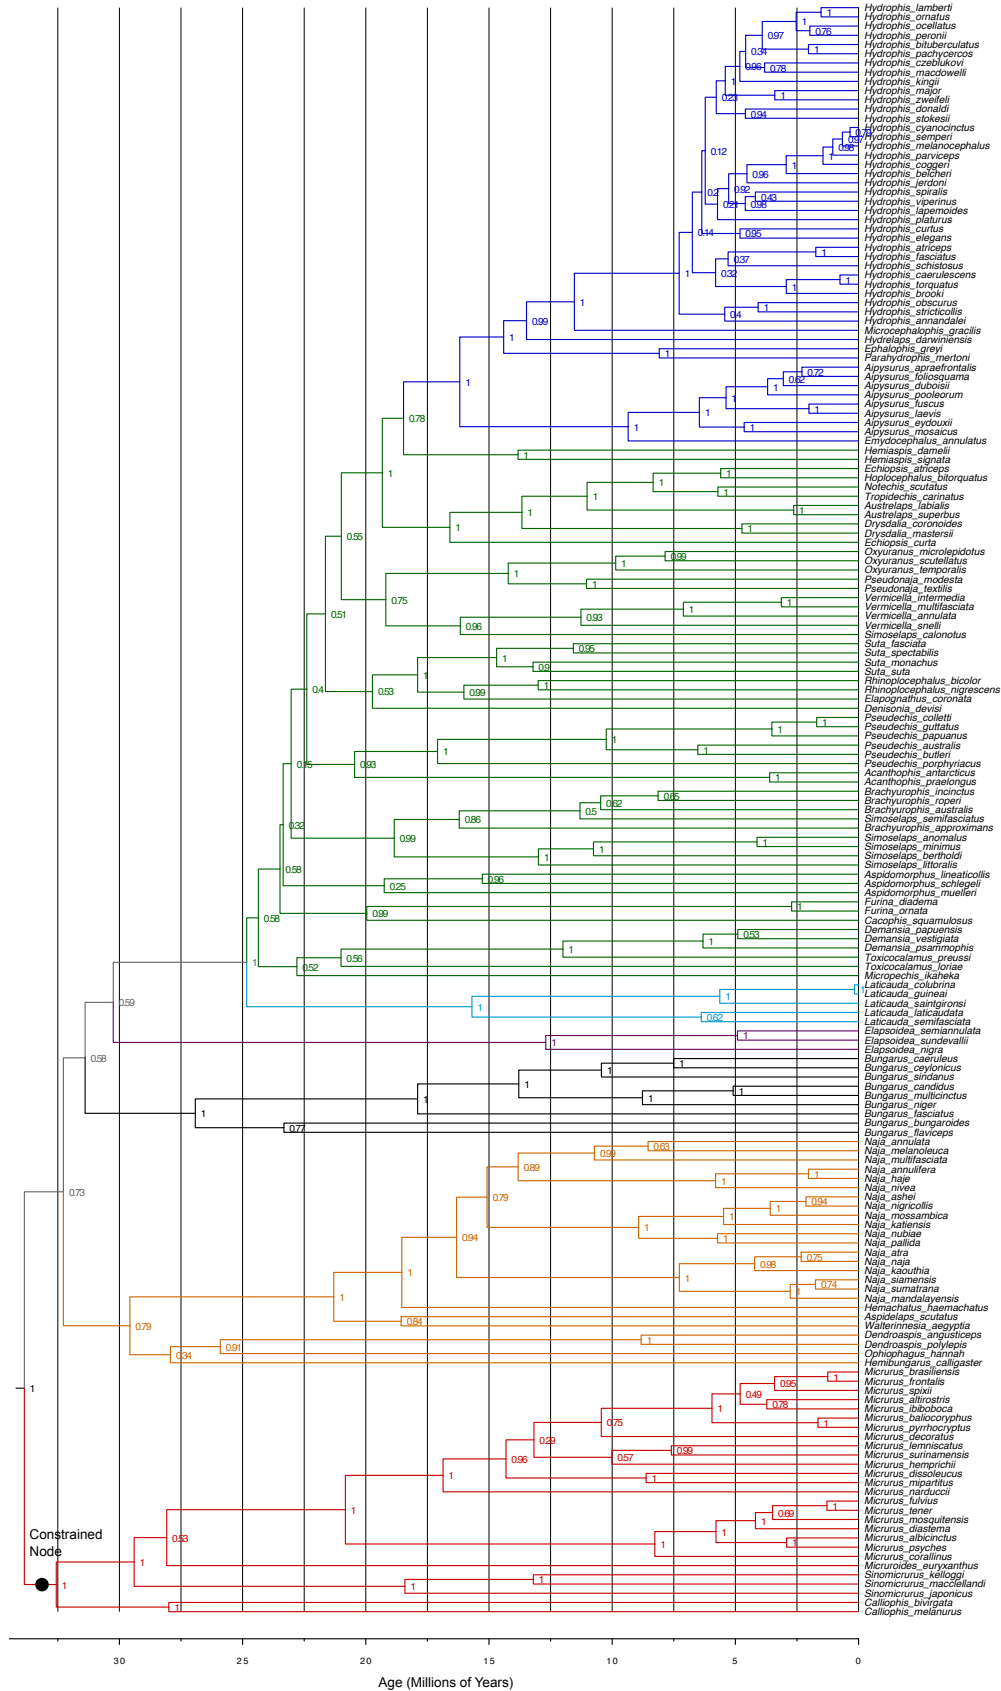

Fig. S3. Relationship between maximum length and average length in 46 species of elapid snakes where both measurements were available (File S2). LS regression (for predicting Ave length using Max length):  $\text{Log}_{10}[\text{AveLength}] = 1.00643 \text{ Log}_{10}[\text{MaxLength}] - 0.18503$ ,  $R^2 = 0.9$  with 44 d.f.

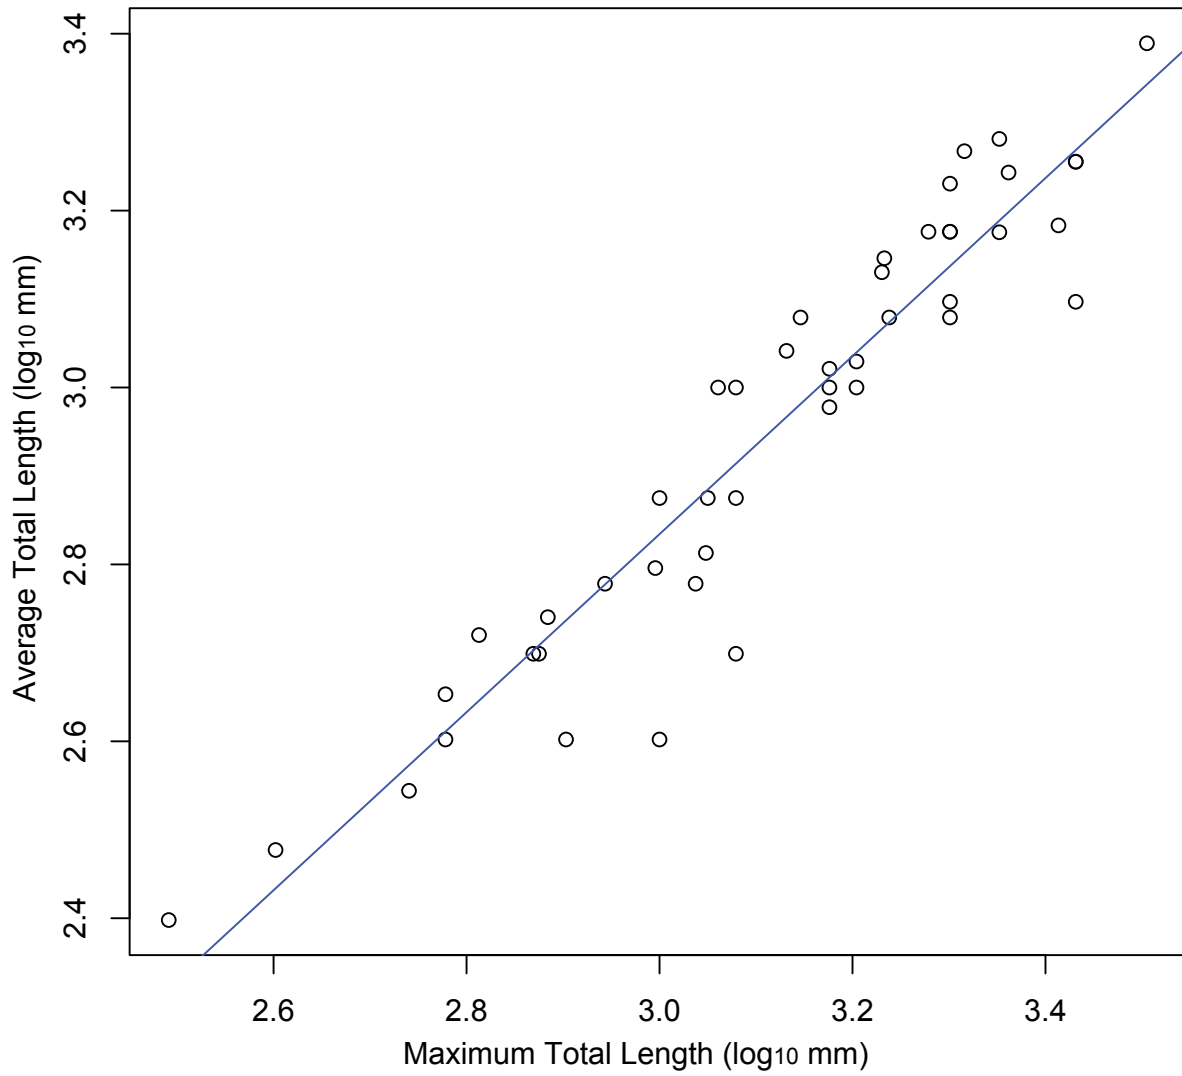

Fig. S4. Dated phylogenetic tree of elapids with rates of extinction inferred using BAMM (warmer colours = faster rates). Circled numbers indicate the two branches with the highest probability of rate shifts, i.e. *Hydrophis* and *Micrurus*. Tree with posterior probabilities of each clade is shown in Fig. S1, rates of speciation are shown in Fig. 1, and the nine rate shift configurations (for diversification) in the 95% credibility shift set are shown in Fig. S5.

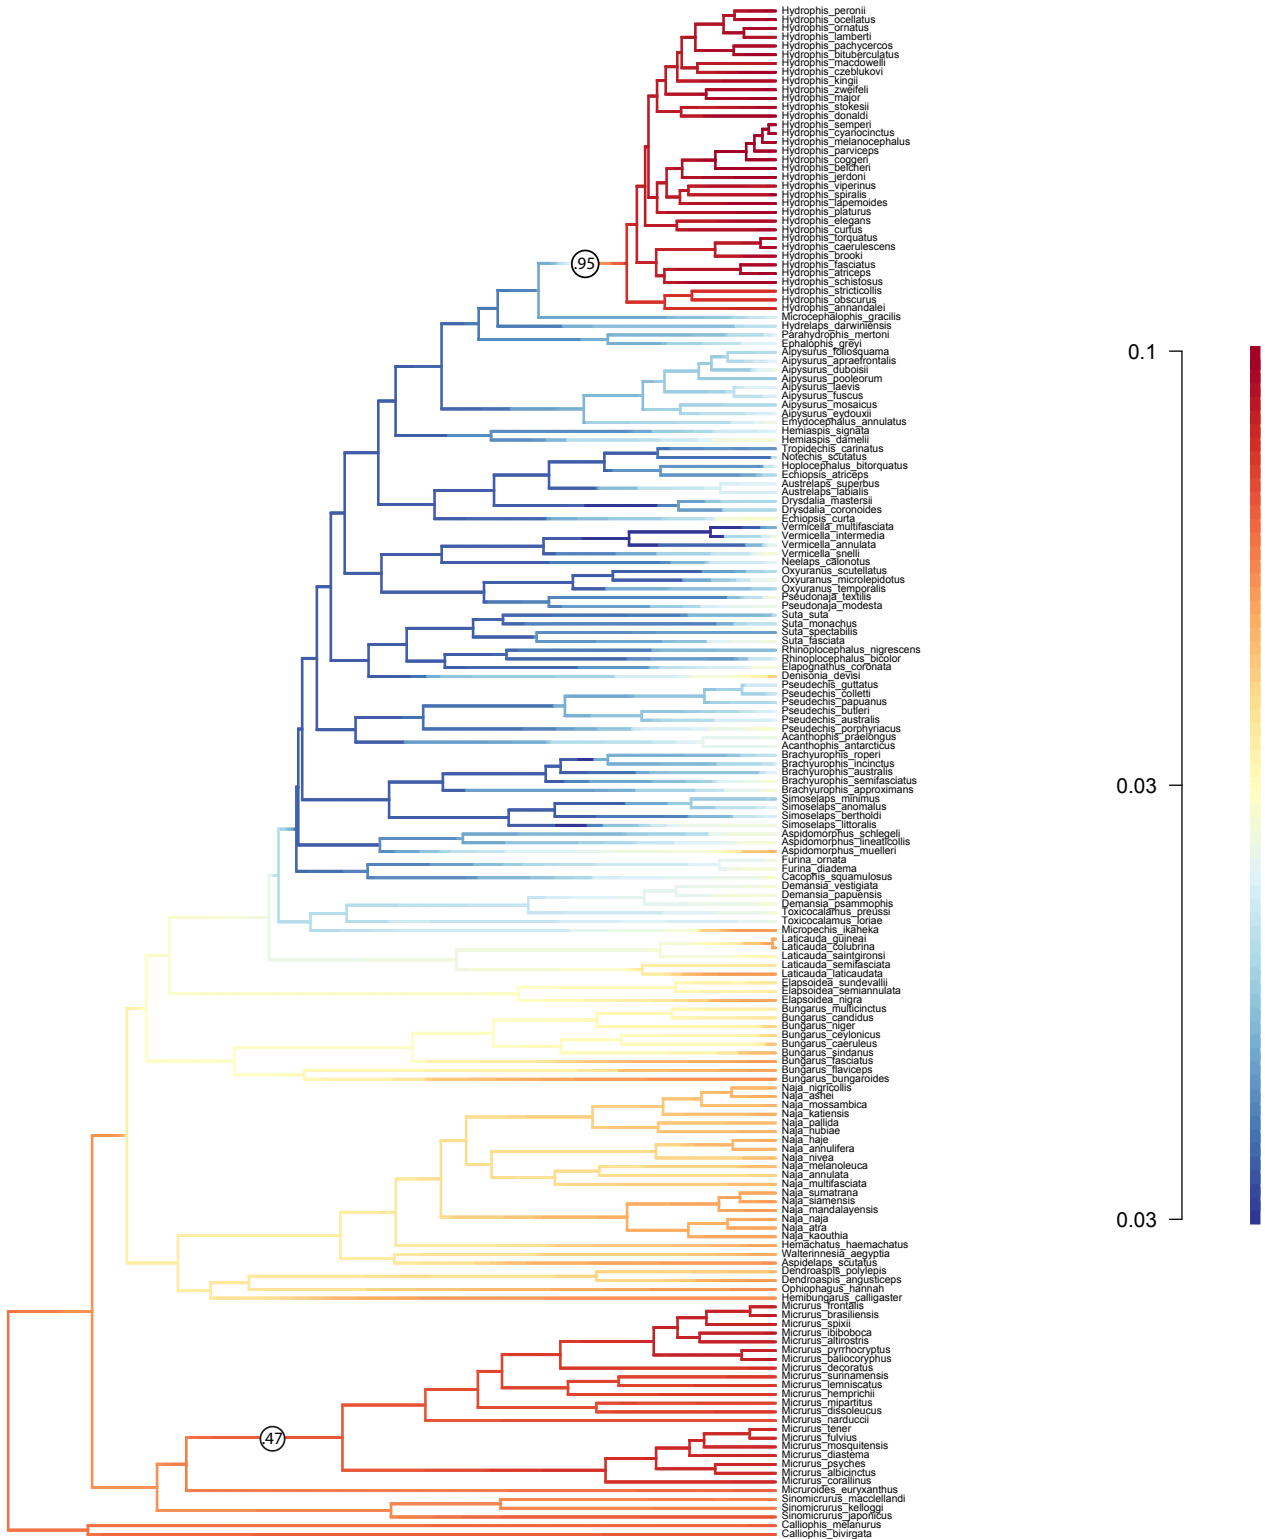

Fig. S5. The 9 most frequently sampled rate shift configurations for speciation/extinction for tree S1, which together comprise the 95% credibility set, as extracted using BAMMtools. Warmer colours = faster rates; size of circle indicates posterior probability of shift (across all sampled trees); red circles denote increases in rate (at initiation of the new regime), blue circles denote decreases. Note that the rate in the new regime in *Micrurus* is initially slightly lower than the background regime in some configurations (1, 7 and 8), but this initial rate is maintained in *Micrurus* (whereas the background rate declines rapidly), resulting in higher overall speciation rates for *Micrurus*; see Fig. S6.

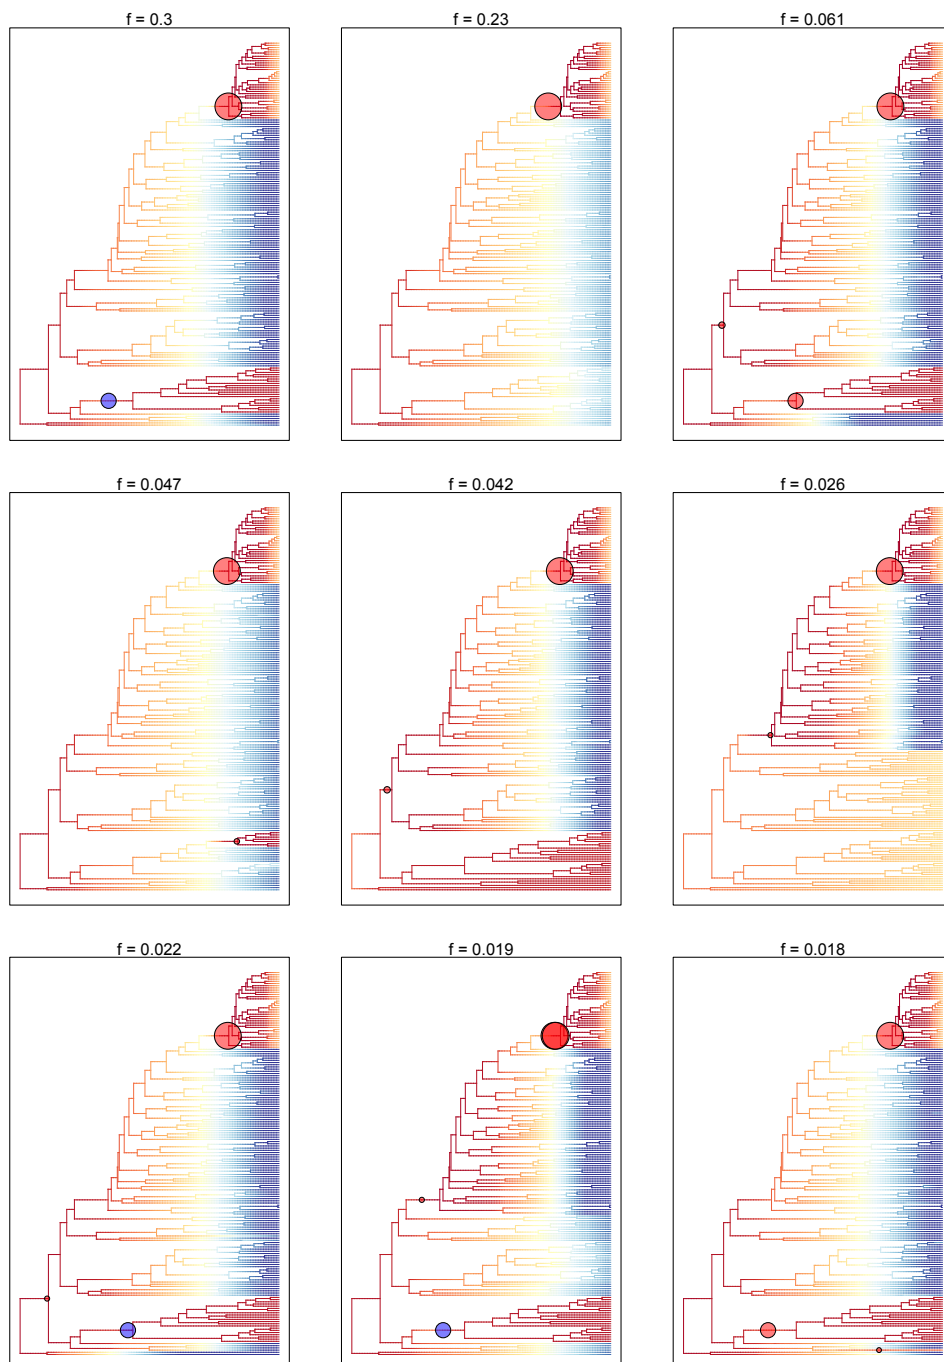

Fig. S6. Speciation rates for elapids in general (excluding *Hydrophis*), *Hydrophis*, and *Micrurus*. Speciation rates decline with time for elapids in general, with two regime shifts: an abrupt increase and subsequent decline in *Hydrophis*, and a shift to a stable rate in *Micrurus*.

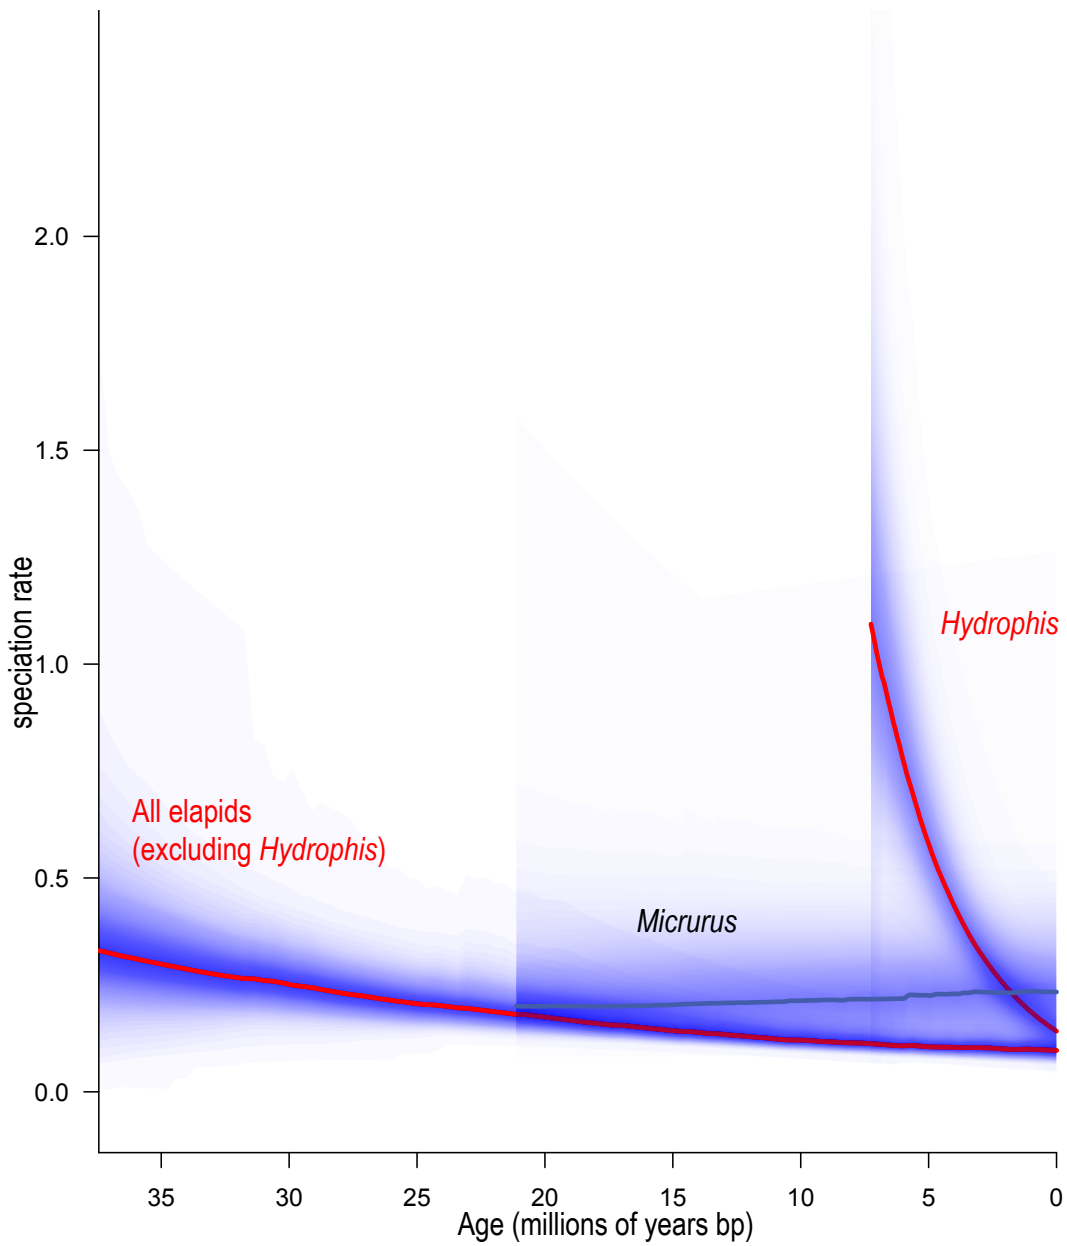



Fig. S7. The 3 most frequently sampled rate shift configurations for evolution of body size (average total length) for tree S1, which together comprise the 95% credibility set, as extracted using BAMMtools. Blue circles indicate decelerations, red circles accelerations, and size of circle is proportional to magnitude of shift. Warmer colours = faster rates; size of circle indicates posterior probability of shift (across all sampled trees); red circles denote increases in rate (at initiation of the new regime), blue circles denote decreases.

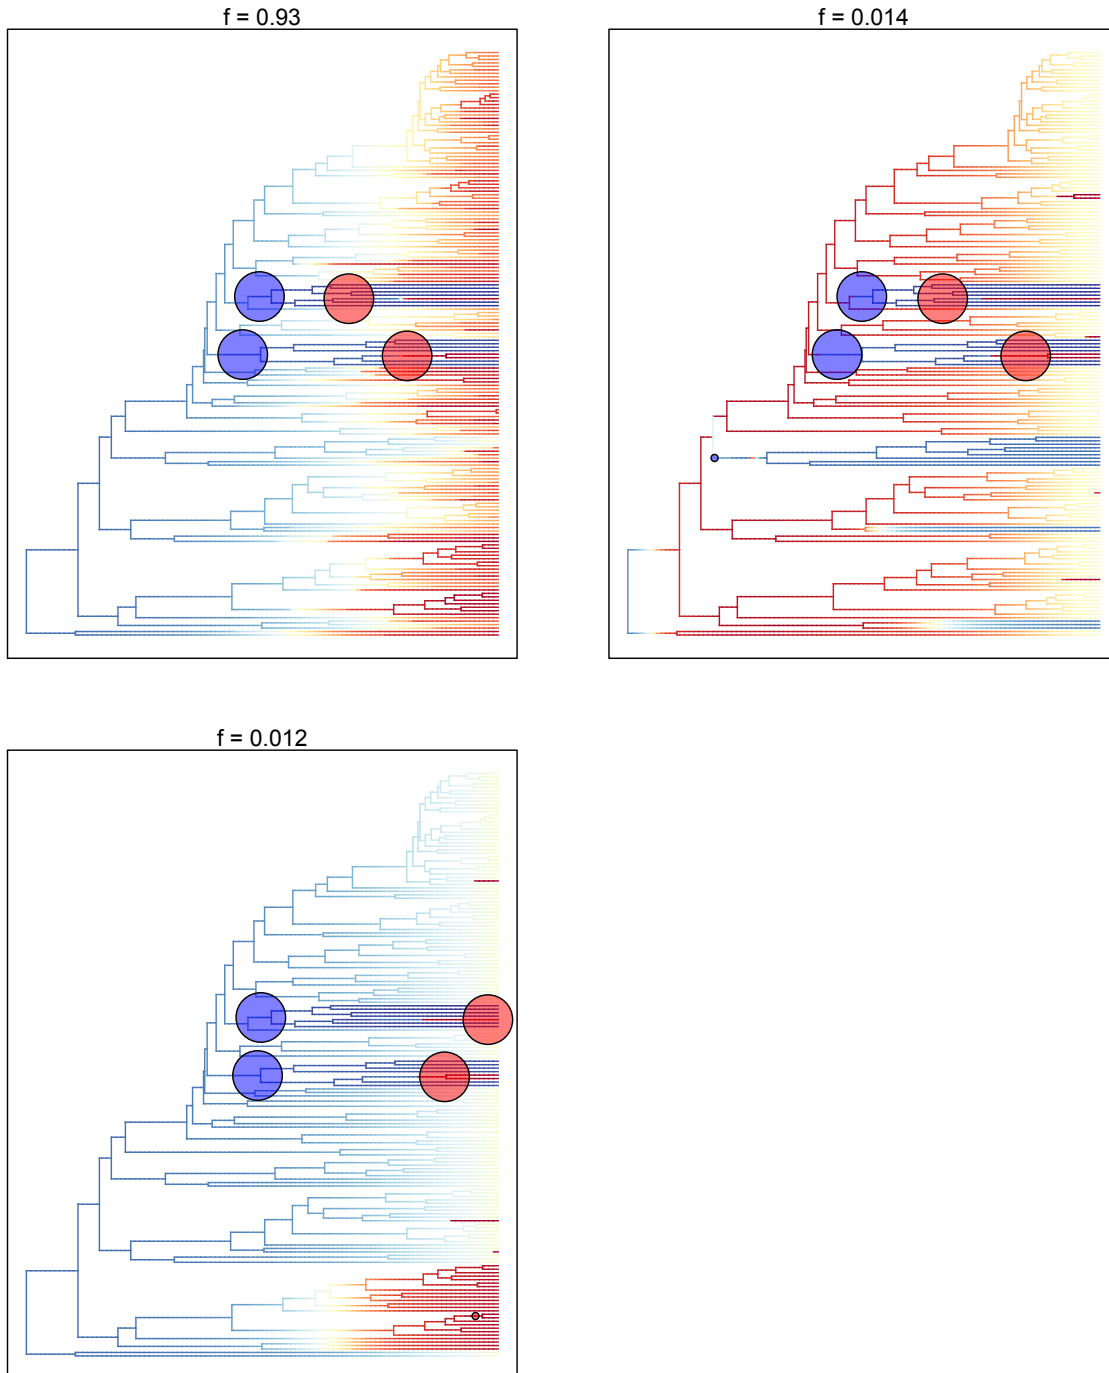

Supplement: rsos150277supp1.pdf [file rsos150277supp1.pdf]
